# Supplementary material for: Tunable afterglow for mechanical self-monitoring 3D printing structures
Source: PubMed Central journal article supplement (PMC10882007; doi:10.1038/s41467-024-45497-4), 2024-02-21
Supplement: 41467_2024_45497_MOESM3_ESM.pdf [file 41467_2024_45497_MOESM3_ESM.pdf]

## **Description of Additional Supplementary Files**

**File Name:** Supplementary Movie 1

**Description:** RTP phenomena and mechanical properties of the 3D printed lattice structures at different photocuring times.

**File Name:** Supplementary Movie 2

**Description:** RTP phenomena and mechanical properties of the 3D printed lattice structures after different humid treatments.

**File Name:** Supplementary Movie 3

**Description:** Failure monitoring of local mechanical properties of 3D printed table structure.
